# Supplementary material for: Curcumin represses mouse 3T3-L1 cell adipogenic differentiation via inhibiting miR-17-5p and stimulating the Wnt signalling pathway effector Tcf7l2
Source: PubMed Central journal article supplement (PMC5386366; doi:10.1038/cddis.2016.455), 2017-01-19
Supplement: cddis2016455x1.pdf [file cddis2016455x1.pdf]

## **Materials and Methods**

**Mouse primary hepatocytes isolation:** Male C57BL/6 mouse (6-8 weeks) were utilized for mouse primary hepatocyte preparation. As we have previously described, hepatic portal vein was cannulated with a 25G evacuated tube butterfly needle in the mice, and liver anterograde collagenase perfusion was conducted using a peristaltic pump [1]. Hepatocytes extracted from the digested liver were culture in 10% FBS containing DMEM (15 mmol/L HEPES, 25 mmol/L glucose, 1 mmol/L sodium lactate, 1% penicillin/streptomycin, 100 nmol/L dexamethasone). Cells were utilized for designated experiments within a 72 h time frame.

## Reference

[1] L. Tian, K. Zeng, W. Shao, B.B. Yang, I.G. Fantus, J. Weng, T. Jin, Short-Term Curcumin Gavage Sensitizes Insulin Signaling in Dexamethasone-Treated C57BL/6 Mice, *The Journal of nutrition* 145(10) (2015) 2300-7.

## Supporting Figure Legends

**Figure S1. The effect of HFD feeding on the expression of hepatic miR-17 and other miR-17/92 cluster members.** A) Mature miR-17-5p level. B) miR-17 precursor level. C) Other members of the cluster. N> or =3. HFD, High Fat Diet; miR-17, miR-17-5p.

**Figure S2. The expression level of miR-17-5p in 3T3-L1 cells after miR-17 inhibition (A) or over-expression (B).** N> or =3. CON, control.

**Figure S3. The effect of miR-17 over-expression and inhibition on the levels of *Tcf7l2* in mouse primary hepatocytes** A-B) *Tcf7l2* mRNA level after miR-17 over-expression. C-D) *Tcf7l2* mRNA level after miR-17-5p inhibition. N> or =3. \*\*, P<0.01; \*\*\*, P<0.001. CON, control nucleotides.

**Figure S4. The effect of curcumin treatment on miR-17-5p and *Tcf7l2* expression in rat primary adipocytes.** A) qRT-PCR results of miR-17-5p in rat adipocytes with 6 h curcumin treatment. B) Detection of *Tcf7l2* protein expression in rat adipocytes with and without 6 h curcumin treatment.

**Figure S5. The effect of miR-17 inhibition and curcumin treatment on *Rb2* expression in 3T3-L1 cells.** A) *Rb2* mRNA levels after miR-17-5p inhibition. B) *Rb2* mRNA levels after miR-17 overexpression. C) *Rb2* mRNA levels after curcumin treatment for 6 h. D) HFD feeding did not change hepatic *Rb2* mRNA expression level. N> or =3. \*, P<0.05. CON, control nucleotides; CUR, curcumin.

**Figure S6. No substantial morphology change in 3T3-L1 cells received 2 or 10  $\mu$ M curcumin treatment for 72 h.**

Fig. S1

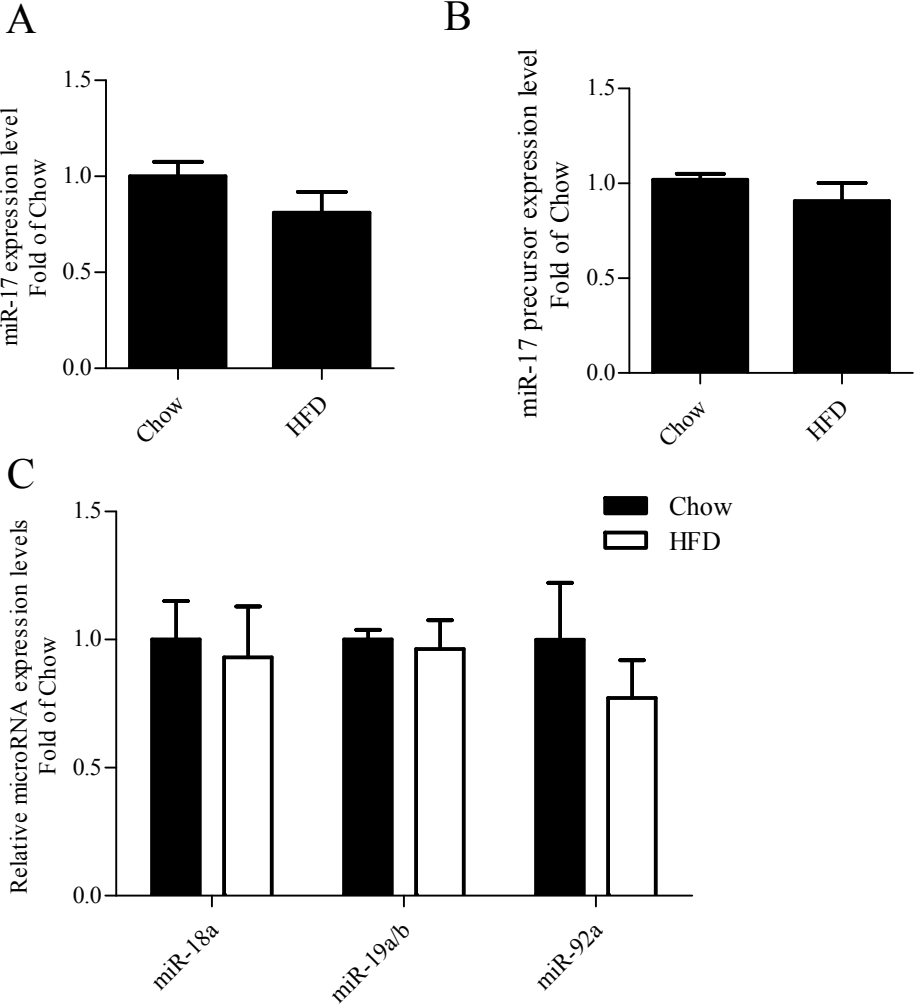

Fig. S2

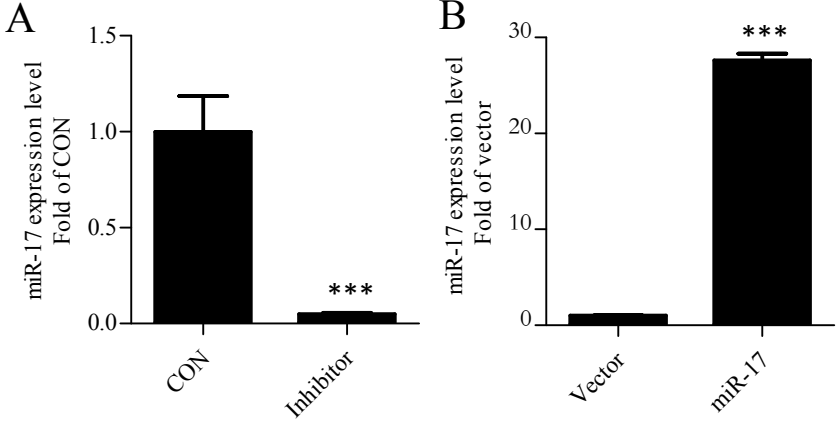

Fig. S3

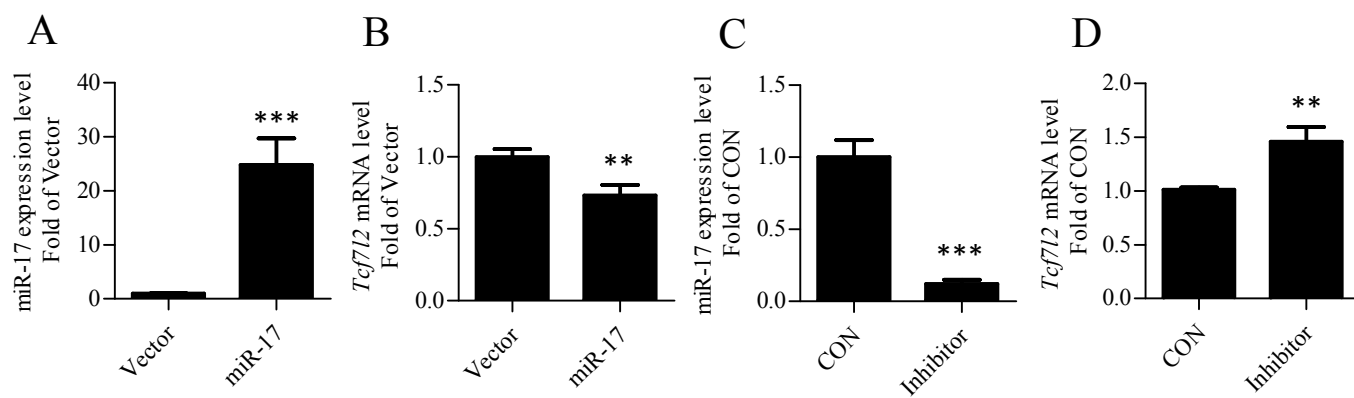

Fig. S4

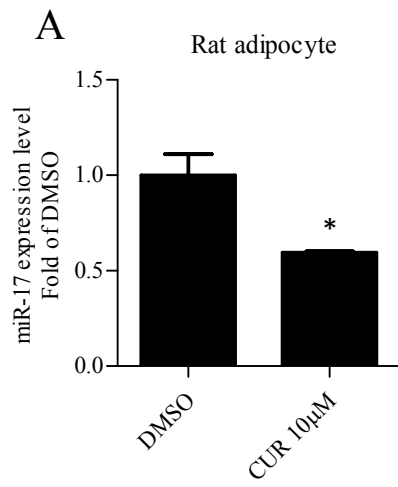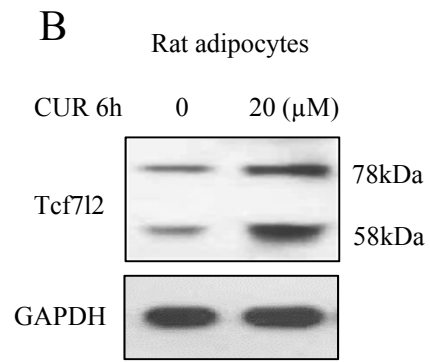

Fig. S5

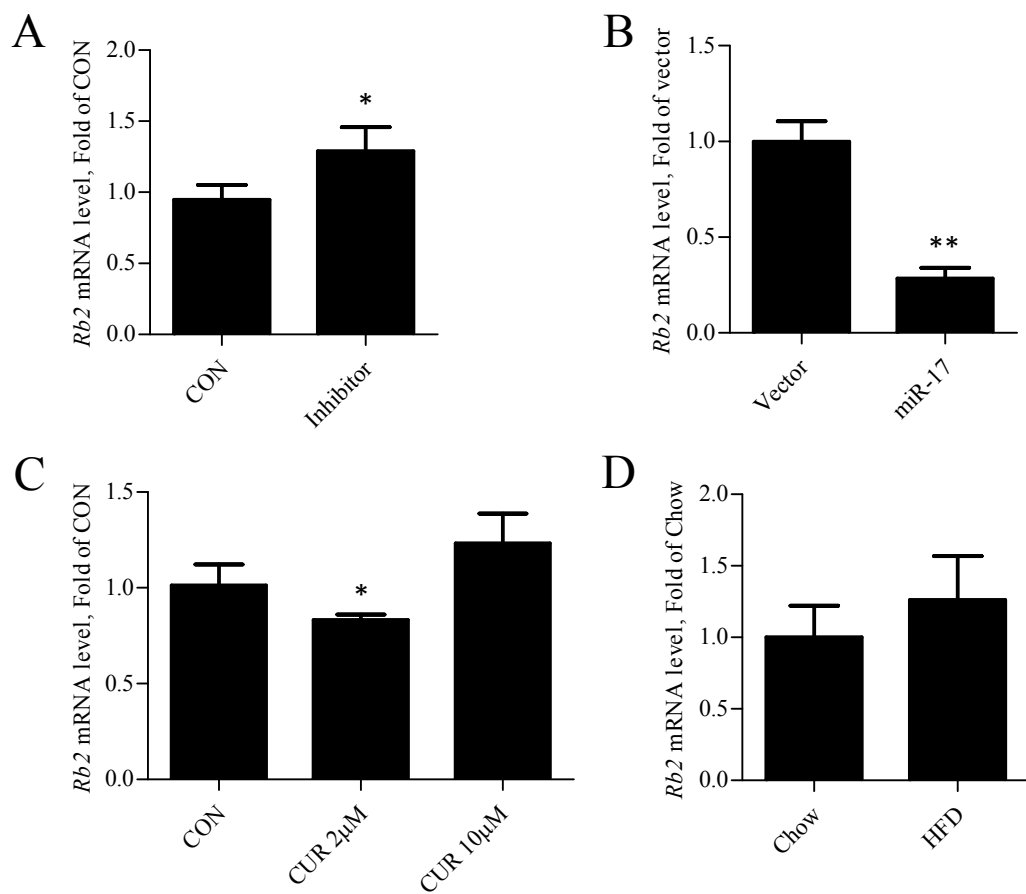

Fig. S6

CON

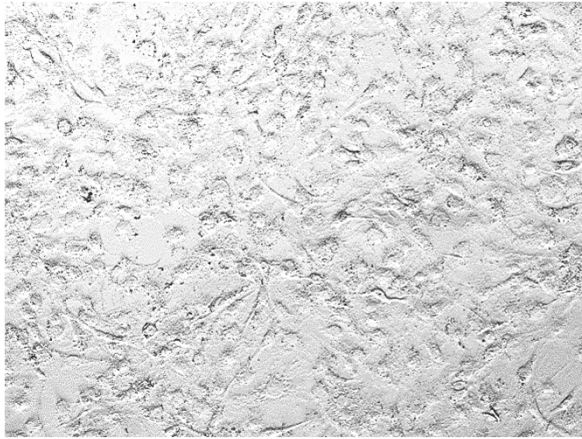

CUR 2 $\mu$ M

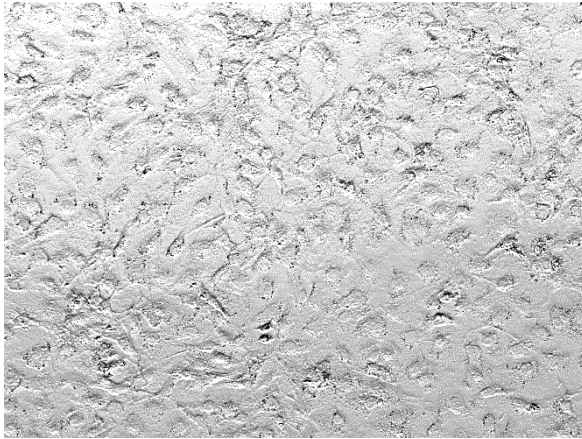

CUR 10 $\mu$ M

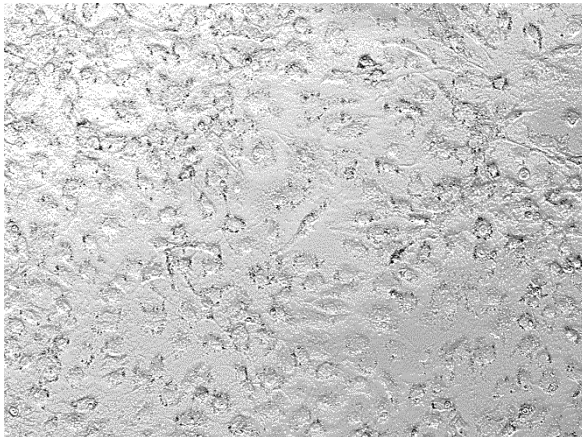



**Supplemental Table 1** Primers utilized in this study

| Name                               | Forward                                    | Reverse                                                  |
|------------------------------------|--------------------------------------------|----------------------------------------------------------|
| miR-17                             | 5'-CAAAGTGCTTACAGTGC-3'                    | 5'-GTGCAGGGTCCGAGGT-3'                                   |
| miR-17 precursor                   | 5'-GTCAGAATAATGTCAAAGTGCTTAC-3'            | 5'-GTCACCATAATGCTACAAGTGCC-3'                            |
| miR-18a                            | 5'-GCCGTAAGGTGCATCTAGTGC-3'                | 5'-GTGCAGGGTCCGAGGT-3'                                   |
| miR-19a                            | 5'-CGGCGTGTGCAAATCTATGCAA-3'               | 5'-GTGCAGGGTCCGAGGT-3'                                   |
| miR-92a                            | 5'-GGCGTATTGCACTTGTCCC-3'                  | 5'-GTGCAGGGTCCGAGGT-3'                                   |
| U6                                 | 5'-GTGCTCGCTTCGGCAGCACATAT-3'              | 5'-CGCTTCACGAATTTGCGTGTGCAT-3'                           |
| <i>Tcf7</i>                        | 5'-AGGTCAGATGGGTTGGACTG-3'                 | 5'-AGGGTGCACACTGGGTTTAG-3'                               |
| <i>Tcf7l1</i>                      | 5'-GAGTGCGAAATCCCCAGTTA-3'                 | 5'-ATGCATGGCTTCTTGCTCTT-3'                               |
| <i>Tcf7l2</i>                      | 5'-AGGAACGACAGCTTCACATG-3'                 | 5'-CGAAAGGCAAGGATTTAGGAAAC-3'                            |
| <i>Rb2</i>                         | 5'-ATGCCACCTCAAACCTAGAG-3'                 | 5'-GGAGCTGTACCTGTCATACAATG-3'                            |
| <i>Axin2</i>                       | 5'-TCCTGACCAAACAGACGAC-3'                  | 5'-ACCTCTGCTGCCACAAAAC-3'                                |
| <i>Actb</i>                        | 5'-TCATGAAGTGTGACGTTGACA-3'                | 5'-CCTAGAAGCATTGCGGTG-3'                                 |
| <i>Tcf7l2</i><br>3'UTR             | 5'-GGGAGCTC<br>TTAGAATAGCTCCGCCTCCTCGTC-3' | 5'-CCACGCGT<br>AACTCCTTCTGGAGGGTGCTTCA-3'                |
| <i>Tcf7l2</i><br>3'UTR<br>mutation | 5'-GGGAGCTC<br>TTAGAATAGCTCCGCCTCCTCGTC-3' | 5'-CCACGCGT<br>AACTCCTTCTGGAGGGTGCTTCA CTCGA<br>GCTTC-3' |
| <i>Cidea</i>                       | 5'-ATTTAAGAGACGCGGCTTTGGGACA-3'            | 5'-TTTGGTTGCTTGCAGACTGGGACAT-3'                          |
| <i>C/EBP<math>\alpha</math></i>    | 5'-CGAGGAGGACGAGGCGAAGCA-3'                | 5'-TGCAGGCGGTCATTGTCAC-3'                                |
| <i>C/EBP<math>\beta</math></i>     | 5'-CACCACGACTTCTCTCCGACCTCT-3'             | 5'-GTACTCGTCGCTCAGCTTGTCCACC-3'                          |
| <i>aP2</i>                         | 5'-TGAAAGAAGTGGGAGTGGGCTTTGC-3'            | 5'-CACCACCAGCTTGTACCATCTCGT-3'                           |
| <i>PPAR<math>\gamma</math></i>     | 5'-CATAAAGTCCTTCCCGCTGA-3'                 | 5'-ACCTCTTTGCTCTGCTCCTG-3'                               |

**Supplemental Table 2** Antibodies utilized in this study

| Antibody Name                    | Catalog No. | Company                   |
|----------------------------------|-------------|---------------------------|
| Tcf7l2                           | #2569       | Cell Signaling Technology |
| Phospho- $\beta$ -Catenin Ser675 | #9567       | Cell Signaling Technology |
| $\beta$ -actin                   | sc69879     | Santa Cruz Biotechnology  |
| GAPDH                            | sc25778     | Santa Cruz Biotechnology  |
| HA                               | sc7392      | Santa Cruz Biotechnology  |
